# Supplementary material
Source: ML conference proceedings conference paper supplement (https://proceedings.mlr.press/v84/yang18c.html)
Supplement: Supplementary file [file yang18c-supp.pdf]

# Supplementary Document for Dimensionality Reduced $\ell^0$ -Sparse Subspace Clustering

Yingzhen Yang  
Independent Researcher

## 1 Proofs

We reiterate the necessary equations and statements before presenting the proofs of theorems in this paper.

$$\min_{\mathbf{Z}} \|\mathbf{Z}\|_0 \quad \text{s.t. } \tilde{\mathbf{X}} = \tilde{\mathbf{X}}\mathbf{Z}, \text{diag}(\mathbf{Z}) = \mathbf{0} \quad (1)$$

**Lemma A.** *Under the assumptions of Theorem 1, for any  $1 \leq k \leq K$ , with probability 1, any  $L \leq \tilde{d}_k$  points in the projected data  $\tilde{\mathbf{X}}^{(k)} \in \mathbb{R}^{p \times n_k}$  that lie in  $\tilde{\mathcal{S}}_k$  are linearly independent.*

*Proof.* For any set  $\{\tilde{\mathbf{x}}_{j_\ell}\}_{\ell=1}^L \triangleq \mathbf{A} \subseteq \tilde{\mathbf{X}}^{(k)}$  that are linearly dependent, let  $\mathcal{H}_\ell \triangleq \mathbf{H}_{\mathbf{A} \setminus \{\tilde{\mathbf{x}}_{j_\ell}\}}$  be the subspace spanned by  $\mathbf{A} \setminus \{\tilde{\mathbf{x}}_{j_\ell}\}$  for  $1 \leq \ell \leq L$ . Then  $\dim[\mathcal{H}_\ell] < L \leq \tilde{d}_k$ , and

$$\begin{aligned} & \Pr[\{\tilde{\mathbf{x}}_{j_\ell}\}_{\ell=1}^L : \{\tilde{\mathbf{x}}_{j_\ell}\}_{\ell=1}^L \text{ are linearly dependent}] \\ & \leq \sum_{\ell=1}^L \Pr[\tilde{\mathbf{x}}_{j_\ell} \in \mathcal{H}_\ell] \end{aligned} \quad (2)$$

Also, for any  $1 \leq \ell \leq L$ , according to Fubini's Theorem,

$$\begin{aligned} \Pr[\tilde{\mathbf{x}}_{j_\ell} \in \mathcal{H}_\ell] &= \Pr[\mathbf{x}_{j_\ell} \in \mathbf{P}^{(-1)}(\mathcal{H}_\ell) \cap \mathcal{S}_k] \\ &= \int_{\times_{\ell'=1}^L \mathcal{S}^{(j_{\ell'})}} \mathbb{1}_{\mathbf{x}_{j_\ell} \in \mathbf{P}^{(-1)}(\mathcal{H}_\ell) \cap \mathcal{S}_k} \otimes_{\ell'=1}^L d\mu^{(j_{\ell'})} \\ &= \int_{\times_{\ell' \neq \ell} \mathcal{S}^{(j_{\ell'})}} \Pr[\mathbf{x}_{j_\ell} \in \mathbf{P}^{(-1)}(\mathcal{H}_\ell) \cap \mathcal{S}_k | \{\mathbf{x}_{j_{\ell'}}\}_{\ell' \neq \ell}] \otimes_{\ell' \neq \ell} d\mu^{(j_{\ell'})} \end{aligned}$$

where  $\mathcal{S}^{(j)} \in \{\mathcal{S}_k\}_{k=1}^K$  is the subspace that  $\mathbf{x}_j$  lies in, and  $\mu^{(j)}$  is the probabilistic measure of the distribution in  $\mathcal{S}^{(j)}$ . Note that  $\mathbf{P}^{(-1)}(\mathcal{H}_\ell) \cap \mathcal{S}_k$  is a subspace lie in  $\mathcal{S}_k$  with dimension less than  $d_k$ . To see this, suppose  $\dim[\mathbf{P}^{(-1)}(\mathcal{H}_\ell) \cap \mathcal{S}_k] = d_k$ , since  $\mathbf{P}^{(-1)}(\mathcal{H}_\ell) \cap \mathcal{S}_k \subseteq \mathcal{S}_k$ , we have  $\mathbf{P}^{(-1)}(\mathcal{H}_\ell) \cap \mathcal{S}_k = \mathcal{S}_k$ , and it follows that  $\mathcal{H}_\ell = \tilde{\mathcal{S}}_k$  and  $\dim[\mathcal{H}_\ell] = \tilde{d}_k$ , contradicting with the fact that  $\dim[\mathcal{H}_\ell] < \tilde{d}_k$ . Since the data distribution in  $\mathcal{S}_k$  is continuous, the probability that the random data point  $\mathbf{x}_{j_\ell}$  lie in a subspace of  $\mathcal{S}_k$  with dimension less than  $d_k$  is zero, i.e.  $\Pr[\mathbf{x}_{j_\ell} \in \mathbf{P}^{(-1)}(\mathcal{H}_\ell) \cap \mathcal{S}_k] = 0$ . According to the union bound (2), the conclusion of this lemma holds.  $\square$

**Theorem 1.** (Subspace detection property holds almost surely for DR- $\ell^0$ -SSC under the randomized models) *Under either the semi-random model or the fully-random model, if  $n_k \geq d_k + 1$  for any  $1 \leq k \leq K$  and  $\mathbf{P}$  is a subspace preserving transformation, then the subspace detection property for DR- $\ell^0$ -SSC holds with probability 1 with the optimal solution  $\mathbf{Z}^*$  to (1).*

*Proof.* We first prove the result under the semi-random model, wherein the subspaces are fixed and the data in each subspace are distributed at random.

For any fixed  $1 \leq i \leq n$ , note that  $\mathbf{Z}^{*i}$  is the optimal solution to the following  $\ell^0$  sparse representation problem

$$\min_{\mathbf{Z}^i} \|\mathbf{Z}^i\|_0 \quad \text{s.t. } \tilde{\mathbf{x}}_i = [\tilde{\mathbf{X}}^{(k)} \setminus \tilde{\mathbf{x}}_i \quad \tilde{\mathbf{X}}^{(-k)}] \mathbf{Z}^i, \mathbf{Z}_{ii} = 0 \quad (3)$$

where  $\tilde{\mathbf{X}}^{(k)} = \mathbf{P}\mathbf{X}^{(k)}$ ,  $\tilde{\mathbf{X}}^{(-k)} = \mathbf{P}\mathbf{X}^{(-k)}$ ,  $\mathbf{X}^{(-k)}$  denotes the data that lie in all subspaces except  $\mathcal{S}_k$ . Let  $\mathbf{Z}^{*i} = \begin{bmatrix} \alpha \\ \beta \end{bmatrix}$  where  $\alpha$  and  $\beta$  are sparse codes corresponding to  $\tilde{\mathbf{X}}^{(k)} \setminus \tilde{\mathbf{x}}_i$  and  $\tilde{\mathbf{X}}^{(-k)}$  respectively.

Suppose  $\beta \neq \mathbf{0}$ , then  $\tilde{\mathbf{x}}_i$  belongs to a subspace  $\mathcal{S}'$  spanned by the projected data points corresponding to nonzero elements of  $\mathbf{Z}^{*i}$ , and  $\mathcal{S}' \neq \tilde{\mathcal{S}}_k$ ,  $\dim[\mathcal{S}'] \leq \tilde{d}_k$ . To see this, if  $\mathcal{S}' = \tilde{\mathcal{S}}_k$ , then the projected data corresponding to nonzero elements of  $\beta$  belong to  $\tilde{\mathcal{S}}_k$ , which is contrary to the definition of  $\mathbf{X}^{(-k)}$ . Also, if  $\dim[\mathcal{S}'] > \tilde{d}_k$ , then any  $\tilde{d}_k$  points in  $\tilde{\mathbf{X}}^{(k)}$  can be used to linearly represent  $\tilde{\mathbf{x}}_i$  almost surely according to Lemma A, contradicting with the optimality of  $\mathbf{Z}^{*i}$ .

Let  $\mathcal{S}'' = \mathcal{S}' \cap \tilde{\mathcal{S}}_k$ , then  $\dim[\mathcal{S}''] \leq \tilde{d}_k$  we now derive the following results according to the dimension of  $\mathcal{S}''$ :

- $\dim[\mathcal{S}''] < \tilde{d}_k$ . By Fubini's Theorem, the probability that  $\tilde{\mathbf{x}}_i$  lies in  $\mathcal{S}''$  is

$$\begin{aligned} \Pr[\tilde{\mathbf{x}}_i \in \mathcal{S}''] &= \int_{\times_{i=1}^n \mathcal{S}^{(i)}} \mathbb{1}_{\tilde{\mathbf{x}}_i \in \mathcal{S}''} \otimes_{i=1}^n d\mu^{(i)} \\ &= \int_{\times_{j \neq i} \mathcal{S}^{(j)}} \Pr[\mathbf{x}_i \in \mathbf{P}^{(-1)}(\mathcal{S}'') \cap \mathcal{S}_k | \{\mathbf{x}_j\}_{j \neq i}] \otimes_{j \neq i} d\mu^{(j)} \end{aligned} \quad (4)$$

where  $\mathcal{S}^{(j)} \in \{\mathcal{S}_k\}_{k=1}^K$  is the subspace that  $\mathbf{x}_j$  lies in, and  $\mu^{(j)}$  is the probabilistic measure of the distribution in  $\mathcal{S}^{(j)}$ .

Since  $\dim[\mathcal{S}''] < \tilde{d}_k$ ,  $\mathbf{P}^{(-1)}(\mathcal{S}'') \cap \mathcal{S}_k$  must be a subspace in  $\mathcal{S}_k$  with dimension less than  $d_k$ . Otherwise, if  $\dim[\mathbf{P}^{(-1)}(\mathcal{S}'') \cap \mathcal{S}_k] = d_k$ , then  $\mathbf{P}^{(-1)}(\mathcal{S}'') \cap \mathcal{S}_k = \mathcal{S}_k$  and  $\mathcal{S}'' = \mathcal{S}_k$ , and it follows that  $\dim[\mathcal{S}''] = \tilde{d}_k$  which contradicts with the condition that  $\dim[\mathcal{S}''] < \tilde{d}_k$ .

Therefore,  $\dim[\mathbf{P}^{(-1)}(\mathcal{S}'') \cap \mathcal{S}_k] < d_k$ , and the probability that  $\mathbf{x}_i$  lies in a subspace of dimension less than  $d_k$  in  $\mathcal{S}_k$  is zero by the similar argument used in the proof of Lemma A. So we have  $\Pr[\mathbf{x}_i \in \mathbf{P}^{(-1)}(\mathcal{S}'') \cap \mathcal{S}_k | \{\mathbf{x}_j\}_{j \neq i}] = 0$ , and it follows that the integral in (4) vanishes, namely  $\Pr[\tilde{\mathbf{x}}_i \in \mathcal{S}''] = 0$ .

- $\dim[\mathcal{S}'] = \tilde{d}_k$ . In this case,  $\mathcal{S}'' = \mathcal{S}' = \tilde{\mathcal{S}}_k$ , which indicates that the data points corresponding to nonzero elements of  $\boldsymbol{\beta}$  belong to  $\tilde{\mathcal{S}}_k$ , contradicting with the definition of  $\tilde{\mathbf{X}}^{(-k)}$ .

Therefore, with probability 1,  $\boldsymbol{\beta} = \mathbf{0}$ . By the union bound over all  $1 \leq i \leq n$ , the conclusion of Theorem 1 holds for the semi-random model.

In the case of fully-random model, note that the subspace detection property holds with probability 1 for any subspaces  $\{\mathcal{S}_k\}_{k=1}^K$ . It follows that with probability 1 over the subspaces and the data, the subspace detection property holds with probability 1.  $\square$

**Theorem 2.** (Subspace detection property holds for DR- $\ell^0$ -SSC under the deterministic model) *Under the deterministic model, suppose  $n_k \geq d_k + 1$ ,  $\mathbf{X}^{(k)}$  is in general position for any  $1 \leq k \leq K$ . Furthermore, if all the data points in  $\mathbf{X}^{(k)}$  are away from the external subspaces under the linear transformation  $\mathbf{P} \in \mathbb{R}^{p \times d}$  for any  $1 \leq k \leq K$ , then the subspace detection property for DR- $\ell^0$ -SSC holds with the optimal solution  $\mathbf{Z}^*$  to (1).*

*Proof.* Similar to the proof of Theorem 1,  $\mathbf{Z}^{*i}$  is the optimal solution to the following  $\ell^0$  sparse representation problem

$$\min_{\mathbf{Z}^i} \|\mathbf{Z}^i\|_0 \quad \text{s.t. } \tilde{\mathbf{x}}_i = [\tilde{\mathbf{X}}^{(k)} \setminus \tilde{\mathbf{x}}_i \quad \tilde{\mathbf{X}}^{(-k)}] \mathbf{Z}^i, \mathbf{Z}_{ii} = 0 \quad (5)$$

where  $\tilde{\mathbf{X}}^{(k)} = \mathbf{P}\mathbf{X}^{(k)}$ ,  $\tilde{\mathbf{X}}^{(-k)} = \mathbf{P}\mathbf{X}^{(-k)}$ ,  $\mathbf{X}^{(-k)}$  denotes the data that lie in all subspaces except  $\mathcal{S}_k$ . Let  $\mathbf{Z}^{*i} = \begin{bmatrix} \boldsymbol{\alpha} \\ \boldsymbol{\beta} \end{bmatrix}$  where  $\boldsymbol{\alpha}$  and  $\boldsymbol{\beta}$  are sparse codes corresponding to  $\tilde{\mathbf{X}}^{(k)} \setminus \tilde{\mathbf{x}}_i$  and  $\tilde{\mathbf{X}}^{(-k)}$  respectively.

Suppose  $\boldsymbol{\beta} \neq \mathbf{0}$ , then  $\tilde{\mathbf{x}}_i$  belongs to a subspace  $\mathcal{S}' = \mathbf{H}_{\tilde{\mathbf{X}}_{\mathbf{Z}^{*i}}}$  spanned by the projected data points corresponding to nonzero elements of  $\mathbf{Z}^{*i}$ , and  $\mathcal{S}' \neq \tilde{\mathcal{S}}_k$ ,

$\dim[\mathcal{S}'] \leq \tilde{d}_k$  by the argument in the proof of Theorem 1. Since the data points (or columns) in  $\tilde{\mathbf{X}}_{\mathbf{Z}^{*i}}$  are linearly independent, it can be verified the data points in  $\tilde{\mathbf{X}}_{\mathbf{Z}^{*i}}$  are also linearly independent. Therefore,

$$\tilde{\mathbf{x}}_i \in \mathbf{H}_{\tilde{\mathbf{X}}_{\mathbf{Z}^{*i}}} \Rightarrow \mathbf{x}_i \in \mathbf{P}^{(-1)}(\mathbf{H}_{\tilde{\mathbf{X}}_{\mathbf{Z}^{*i}}}) \Rightarrow \mathbf{x}_i \in \mathbf{P}^{(-1)}(\mathbf{P}(\mathbf{H}_{\tilde{\mathbf{X}}_{\mathbf{Z}^{*i}}}))$$

And it follows that  $\mathbf{x}_i$  lies in an external subspace  $\mathbf{H}_{\tilde{\mathbf{X}}_{\mathbf{Z}^{*i}}}$  spanned by linearly independent points in  $\tilde{\mathbf{X}}_{\mathbf{Z}^{*i}}$  under the mapping  $\mathbf{P}^{(-1)} \circ \mathbf{P}$ , and  $\dim[\mathbf{H}_{\tilde{\mathbf{X}}_{\mathbf{Z}^{*i}}}] = \dim[\mathcal{S}'] \leq \tilde{d}_k$ . Therefore,  $\boldsymbol{\beta} = \mathbf{0}$ . Perform the above analysis for all  $1 \leq i \leq n$ , we can prove that the subspace detection property holds for all  $1 \leq i \leq n$ .  $\square$

**Lemma 1.** (Corollary 10.9 in [1]) *Let  $p_0 \geq 2$  and  $p' = p - p_0 \geq 4$ , then with probability at least  $1 - 6e^{-p}$ , then the spectral norm of  $\mathbf{X} - \hat{\mathbf{X}}$  is bounded by*

$$\|\mathbf{X} - \hat{\mathbf{X}}\|_2 \leq C_{p,p_0} \quad (6)$$

where

$$C_{p,p_0} = (1 + 17\sqrt{1 + \frac{p_0}{p'}})\sigma_{p_0+1} + \frac{8\sqrt{p}}{p'+1} \left( \sum_{j>p_0} \sigma_j^2 \right)^{\frac{1}{2}} \quad (7)$$

and  $\sigma_1 \geq \sigma_2 \geq \dots$  are the singular values of  $\mathbf{X}$ .

**Lemma 2.** (Perturbation of distance to subspaces) *Let  $\mathbf{A}, \mathbf{B} \in \mathbb{R}^{m \times n}$  are two matrices and  $\text{rank}(\mathbf{A}) = r$ ,  $\text{rank}(\mathbf{B}) = s$ . Also,  $\mathbf{E} = \mathbf{A} - \mathbf{B}$  and  $\|\mathbf{E}\|_2 \leq C$ , where  $\|\cdot\|_2$  indicates the spectral norm. Then for any point  $\mathbf{x} \in \mathbb{R}^m$ , the difference of the distance of  $\mathbf{x}$  to the column space of  $\mathbf{A}$  and  $\mathbf{B}$ , i.e.  $|d(\mathbf{x}, \mathbf{H}_{\mathbf{A}}) - d(\mathbf{x}, \mathbf{H}_{\mathbf{B}})|$ , is bounded by*

$$|d(\mathbf{x}, \mathbf{H}_{\mathbf{A}}) - d(\mathbf{x}, \mathbf{H}_{\mathbf{B}})| \leq \frac{C\|\mathbf{x}\|_2}{\min\{\sigma_r(\mathbf{A}), \sigma_s(\mathbf{B})\}} \quad (8)$$

*Proof.* Note that the projection of  $\mathbf{x}$  onto the subspace  $\mathbf{H}_{\mathbf{A}}$  is  $\mathbf{A}\mathbf{A}^+\mathbf{x}$  where  $\mathbf{A}^+$  is the Moore-Penrose pseudo-inverse of the matrix  $\mathbf{A}$ , so  $d(\mathbf{x}, \mathbf{H}_{\mathbf{A}})$  equals to the distance between  $\mathbf{x}$  and its projection, namely  $d(\mathbf{x}, \mathbf{H}_{\mathbf{A}}) = \|\mathbf{x} - \mathbf{A}\mathbf{A}^+\mathbf{x}\|_2$ . Similarly,  $d(\mathbf{x}, \mathbf{H}_{\mathbf{B}}) = \|\mathbf{x} - \mathbf{B}\mathbf{B}^+\mathbf{x}\|_2$ .

It follows that

$$\begin{aligned} |d(\mathbf{x}, \mathbf{H}_{\mathbf{A}}) - d(\mathbf{x}, \mathbf{H}_{\mathbf{B}})| &= \|\mathbf{x} - \mathbf{A}\mathbf{A}^+\mathbf{x}\|_2 - \|\mathbf{x} - \mathbf{B}\mathbf{B}^+\mathbf{x}\|_2 \\ &\leq \|\mathbf{A}\mathbf{A}^+\mathbf{x} - \mathbf{B}\mathbf{B}^+\mathbf{x}\|_2 \leq \|\mathbf{A}\mathbf{A}^+ - \mathbf{B}\mathbf{B}^+\|_2 \|\mathbf{x}\|_2 \end{aligned} \quad (9)$$

According to the perturbation bound on the orthogonal projection in [2, 3],

$$\|\mathbf{A}\mathbf{A}^+ - \mathbf{B}\mathbf{B}^+\|_2 \leq \max\{\|\mathbf{E}\mathbf{A}^+\|_2, \|\mathbf{E}\mathbf{B}^+\|_2\} \quad (10)$$

Since  $\|\mathbf{E}\mathbf{A}^+\|_2 \leq \|\mathbf{E}\|_2 \|\mathbf{A}^+\|_2 \leq \frac{C}{\sigma_r(\mathbf{A})}$ ,  $\|\mathbf{E}\mathbf{B}^+\|_2 \leq \|\mathbf{E}\|_2 \|\mathbf{B}^+\|_2 \leq \frac{C}{\sigma_s(\mathbf{B})}$ , combining (9) and (10), we have

$$|d(\mathbf{x}, \mathbf{H}_{\mathbf{A}}) - d(\mathbf{x}, \mathbf{H}_{\mathbf{B}})| \leq \max\left\{\frac{C}{\sigma_r(\mathbf{A})}, \frac{C}{\sigma_s(\mathbf{B})}\right\} \|\mathbf{x}\|_2$$

$$= \frac{C\|\mathbf{x}\|_2}{\min\{\sigma_r(\mathbf{A}), \sigma_s(\mathbf{B})\}} \quad (11)$$

□

**Theorem 3.** *Under the deterministic model, suppose  $n_k \geq d_k + 1$ ,  $\mathbf{X}^{(k)}$  is in general position,  $\sigma_{\tilde{d}_k} > C_{p,p_0}$  for any  $1 \leq k \leq K$ , and  $C_{p,p_0}$  is defined by (7) with  $p_0 \geq 2$ . Suppose that data  $\mathbf{X}^{(k)}$  are in general position with margin  $\tau_k$  such that  $\tau_k > 1 + \frac{C_{p,p_0}}{\sigma_{\tilde{d}_k} - C_{p,p_0}}$ . Moreover, all the data points in  $\mathbf{X}^{(k)}$  are  $\gamma_k$ -away from the external subspaces of dimension no greater than  $\tilde{d}_k$  for any  $1 \leq k \leq K$  with  $\gamma_k > 1 + \frac{C_{p,p_0}}{\sigma_{\tilde{d}_k} - C_{p,p_0}}$ . Then with probability at least  $1 - 6e^{-p}$ , the subspace detection property for DR- $\ell^0$ -SSC holds with the optimal solution  $\mathbf{Z}^*$  to (1), using the linear projection  $\mathbf{P} = \mathbf{Q}^\top$ .*

*Proof.* Suppose there is  $1 \leq k \leq K$  and a point  $\mathbf{x} \in \mathbf{X}^{(k)}$  such that  $d(\mathbf{x}, \mathbf{H}) = 0$  for some  $\mathbf{H} \in \mathbf{P}^{(-1)} \circ \mathbf{P}(\mathcal{H}_{\mathbf{x}, \tilde{d}_k})$ , then there exist  $L \leq \tilde{d}_k$  independent points  $\{\mathbf{x}_{i_j}\}_{j=1}^L \subseteq \mathbf{X}$  such that  $\{\mathbf{x}_{i_j}\}_{j=1}^L \not\subseteq \mathbf{X}^{(k)}$  and  $\mathbf{x} \notin \{\mathbf{x}_{i_j}\}_{j=1}^L$ ,  $\tilde{\mathbf{x}} \in \mathbf{P}(\mathbf{H}_{\{\mathbf{x}_{i_j}\}_{j=1}^L}) = \mathbf{H}_{\{\tilde{\mathbf{x}}_{i_j}\}_{j=1}^L}$ . Now we define  $\tilde{\mathbf{t}} = \mathbf{P}^\top \mathbf{t} = \mathbf{Q}\mathbf{Q}^\top \mathbf{t}$  for any  $\mathbf{t} \in \mathbb{R}^d$ . Since the rows of  $\mathbf{P}$  are linearly independent,  $\tilde{\mathbf{x}} \in \mathbf{H}_{\{\tilde{\mathbf{x}}_{i_j}\}_{j=1}^L} \Leftrightarrow \tilde{\mathbf{x}} \in \mathbf{H}_{\{\tilde{\mathbf{x}}_{i_j}\}_{j=1}^L}$ .

Let  $\mathbf{A} \in \mathbb{R}^{d \times L} = [\mathbf{x}_{i_1}, \dots, \mathbf{x}_{i_L}]$  be the matrix with  $\{\mathbf{x}_{i_j}\}_{j=1}^L$  as it columns, and  $\tilde{\mathbf{A}} \in \mathbb{R}^{d \times L} = [\tilde{\mathbf{x}}_{i_1}, \dots, \tilde{\mathbf{x}}_{i_L}]$  be the matrix with  $\{\tilde{\mathbf{x}}_{i_j}\}_{j=1}^L$  as it columns. Note that

$$\|\mathbf{A} - \tilde{\mathbf{A}}\|_2 \leq \|\mathbf{X} - \mathbf{Q}\mathbf{Q}^\top \mathbf{X}\|_2 = \|\mathbf{X} - \tilde{\mathbf{X}}\|_2 \leq C_{p,p_0}$$

By Weyl [4],  $|\sigma_i(\mathbf{A}) - \sigma_i(\tilde{\mathbf{A}})| \leq \|\mathbf{A} - \tilde{\mathbf{A}}\|_2$ . Then we have  $\sigma_L(\tilde{\mathbf{A}}) \geq \sigma_L(\mathbf{A}) - \|\mathbf{A} - \tilde{\mathbf{A}}\|_2 \geq \sigma_L(\mathbf{A}) - C_{p,p_0} \geq \sigma_{\tilde{d}_k} - C_{p,p_0} > 0$ . It follows that  $\text{rank}(\tilde{\mathbf{A}}) = L$ . In addition,  $\sigma_L(\mathbf{A}) \geq \sigma_{\tilde{d}_k}$ .

Therefore, according to Lemma 2,

$$\begin{aligned} |d(\mathbf{x}, \mathbf{H}_{\tilde{\mathbf{A}}}) - d(\mathbf{x}, \mathbf{H}_{\mathbf{A}})| &\leq \frac{C_{p,p_0}\|\mathbf{x}\|_2}{\min\{\sigma_L(\mathbf{A}), \sigma_L(\tilde{\mathbf{A}})\}} \\ &\leq \frac{C_{p,p_0}}{\sigma_{\tilde{d}_k} - C_{p,p_0}} \end{aligned} \quad (12)$$

Moreover, we have

$$\begin{aligned} |d(\tilde{\mathbf{x}}, \mathbf{H}_{\tilde{\mathbf{A}}}) - d(\mathbf{x}, \mathbf{H}_{\tilde{\mathbf{A}}})| &\leq \|\tilde{\mathbf{x}} - \mathbf{x}\|_2 \\ &= \|\mathbf{Q}\mathbf{Q}^\top \mathbf{x} - \mathbf{x}\|_2 \leq \|\mathbf{x}\|_2 \leq 1 \end{aligned} \quad (13)$$

where  $\mathbf{e}_{\mathbf{x}} \in \mathbb{R}^n$ ,  $(\mathbf{e}_{\mathbf{x}})_i = 1$  for the index  $i$  such that  $\mathbf{x}_i = \mathbf{x}$ , and  $(\mathbf{e}_{\mathbf{x}})_j = 0$  for all  $j \neq i$ . For the first inequality in (13), note that for any  $\varepsilon > 0$ , there exists  $\mathbf{y} \in \mathbf{H}_{\tilde{\mathbf{A}}}$  such that  $d(\tilde{\mathbf{x}}, \mathbf{H}_{\tilde{\mathbf{A}}}) + \varepsilon > d(\tilde{\mathbf{x}}, \mathbf{y})$ . It follows that  $\|\tilde{\mathbf{x}} - \mathbf{x}\|_2 + d(\tilde{\mathbf{x}}, \mathbf{H}_{\tilde{\mathbf{A}}}) + \varepsilon > \|\tilde{\mathbf{x}} - \mathbf{x}\|_2 + \|\tilde{\mathbf{x}} - \mathbf{y}\|_2 \geq \|\mathbf{x} - \mathbf{y}\|_2 \geq d(\mathbf{x}, \mathbf{H}_{\tilde{\mathbf{A}}})$  for any  $\varepsilon > 0$ . Therefore,

$\|\tilde{\mathbf{x}} - \mathbf{x}\|_2 \geq d(\mathbf{x}, \mathbf{H}_{\tilde{\mathbf{A}}}) - d(\tilde{\mathbf{x}}, \mathbf{H}_{\tilde{\mathbf{A}}})$ . Similarly,  $\|\tilde{\mathbf{x}} - \mathbf{x}\|_2 \geq d(\tilde{\mathbf{x}}, \mathbf{H}_{\tilde{\mathbf{A}}}) - d(\mathbf{x}, \mathbf{H}_{\tilde{\mathbf{A}}})$ .

Combining (12) and (13), we have

$$|d(\tilde{\mathbf{x}}, \mathbf{H}_{\tilde{\mathbf{A}}}) - d(\mathbf{x}, \mathbf{H}_{\tilde{\mathbf{A}}})| \leq 1 + \frac{C_{p,p_0}}{\sigma_{\tilde{d}_k} - C_{p,p_0}} \quad (14)$$

Since  $\mathbf{x} \in \mathbf{X}^{(k)}$  is  $\gamma_k$ -away from the an external subspaces of dimension no greater than  $\tilde{d}_k$ , we have  $d(\mathbf{x}, \mathbf{H}_{\tilde{\mathbf{A}}}) \geq \gamma_k$ . Therefore,  $d(\tilde{\mathbf{x}}, \mathbf{H}_{\tilde{\mathbf{A}}}) \geq \gamma_k - 1 - \frac{C_{p,p_0}}{\sigma_{\tilde{d}_k} - C_{p,p_0}} > 0$ . It follows that  $\tilde{\mathbf{x}} \notin \mathbf{H}_{\tilde{\mathbf{A}}}$ , and  $\tilde{\mathbf{x}} \notin \mathbf{H}_{\{\tilde{\mathbf{x}}_{i_j}\}_{j=1}^L}$ . This contradiction indicates that all the data points in  $\mathbf{X}^{(k)}$  are away from the external subspaces under the linear transformation  $\mathbf{P}$  for any  $1 \leq k \leq K$ . It can also be verified that data  $\tilde{\mathbf{X}}^{(k)}$  are in generation position by similar argument and the definition of general position with margin. Therefore, the conclusion of this theorem follows by applying Theorem 2.

□

**Lemma 3.** (Lemma 6 in [5], adjusted with our notations) *Suppose  $\mathbf{P}$  satisfies the  $\ell^2$ -norm preserving property. If  $0 < \varepsilon \leq \frac{1}{2}$ , then for any two vectors  $\mathbf{u} \in \mathbb{R}^d$ ,  $\mathbf{v} \in \mathbb{R}^d$ , with probability at least  $1 - 4e^{-\frac{p\varepsilon^2}{c}}$ ,*

$$|\mathbf{u}^\top \mathbf{P}^\top \mathbf{P} \mathbf{v} - \mathbf{u}^\top \mathbf{v}| \leq \|\mathbf{u}\|_2 \|\mathbf{v}\|_2 \varepsilon \quad (15)$$

**Lemma 4.** *Suppose  $\mathbf{P}$  satisfies the  $\ell^2$ -norm preserving property. If  $0 < \varepsilon \leq \frac{1}{2}$ , then for any vector  $\mathbf{v} \in \mathbb{R}^d$ , with probability at least  $1 - 4de^{-\frac{p\varepsilon^2}{c}}$ ,*

$$|\tilde{\mathbf{v}} - \mathbf{v}|_2 \leq \sqrt{d} \|\mathbf{v}\|_2 \varepsilon \quad (16)$$

where  $\tilde{\mathbf{v}} = \mathbf{P}^\top \mathbf{P} \mathbf{v}$ .

*Proof.* Choosing  $\mathbf{e}_i \in \mathbb{R}^n$  where  $(\mathbf{e}_i)_i = 1$  and  $(\mathbf{e}_i)_j = 0$  for all  $j \neq i$ . Applying Lemma 3 with  $\mathbf{u} = \mathbf{e}_i$ , then with probability at least  $1 - 4e^{-\frac{p\varepsilon^2}{c}}$ ,

$$\begin{aligned} |(\mathbf{e}_i)^\top \mathbf{P}^\top \mathbf{P} \mathbf{v} - (\mathbf{e}_i)^\top \mathbf{v}| \\ = |\tilde{\mathbf{v}}_i - \mathbf{v}_i| \leq \|(\mathbf{e}_i)_i\|_2 \|\mathbf{v}\|_2 \varepsilon = \|\mathbf{v}\|_2 \varepsilon \end{aligned} \quad (17)$$

By the union bound, with probability at least  $1 - 4de^{-\frac{p\varepsilon^2}{c}}$ ,

$$|\tilde{\mathbf{v}} - \mathbf{v}|_2 \leq \sqrt{d} \|\mathbf{v}\|_2 \varepsilon \quad (18)$$

□

**Theorem 4.** *Let  $\mathbf{P}$  satisfy the  $\ell^2$ -norm preserving property. Under the deterministic model, suppose  $n_k \geq$*

$d_k + 1$ ,  $\sigma_{\tilde{d}_k} > \sqrt{d\tilde{d}_k}\varepsilon$  for  $0 < \varepsilon \leq \frac{1}{2}$ . Suppose that data  $\mathbf{X}^{(k)}$  are in general position with margin  $\tau_k$  such that  $\tau_k > \sqrt{d}\varepsilon(1 + \frac{\sqrt{\tilde{d}_k}}{\sigma_{\tilde{d}_k} - \sqrt{d\tilde{d}_k}\varepsilon})$ . Moreover, all the data points in  $\mathbf{X}^{(k)}$  are  $\gamma_k$ -away from the external subspaces of dimension no greater than  $\tilde{d}_k$  for any  $1 \leq k \leq K$  with  $\gamma_k > \sqrt{d}\varepsilon(1 + \frac{\sqrt{\tilde{d}_k}}{\sigma_{\tilde{d}_k} - \sqrt{d\tilde{d}_k}\varepsilon})$ . Then with probability at least  $1 - 4nde^{-\frac{p\varepsilon^2}{c}}$ , the subspace detection property for DR- $\ell^0$ -SSC holds with the optimal solution  $\mathbf{Z}^*$  to (1).

*Proof.* Suppose there is  $1 \leq k \leq K$  and a point  $\mathbf{x} \in \mathbf{X}^{(k)}$  such that  $d(\mathbf{x}, \mathbf{H}) = 0$  for some  $\mathbf{H} \in \mathbf{P}^{(-1)} \circ \mathbf{P}(\mathcal{H}_{\mathbf{x}, \tilde{d}_k})$ , then there exist  $L \leq \tilde{d}_k$  independent points  $\{\mathbf{x}_{i_j}\}_{j=1}^L \subseteq \mathbf{X}$  such that  $\{\mathbf{x}_{i_j}\}_{j=1}^L \not\subseteq \mathbf{X}^{(k)}$  and  $\mathbf{x} \notin \{\mathbf{x}_{i_j}\}_{j=1}^L$ . It follows that  $\tilde{\mathbf{x}} \in \mathbf{P}(\mathbf{H}_{\{\mathbf{x}_{i_j}\}_{j=1}^L}) = \mathbf{H}_{\{\tilde{\mathbf{x}}_{i_j}\}_{j=1}^L}$ .

For any vector  $\mathbf{t} \in \mathbb{R}^d$ , define  $\bar{\mathbf{t}} = \mathbf{P}^\top \mathbf{P} \mathbf{t}$ . Let  $\mathbf{A} \in \mathbb{R}^{d \times L} = [\mathbf{x}_{i_1}, \dots, \mathbf{x}_{i_L}]$  be the matrix with  $\{\mathbf{x}_{i_j}\}_{j=1}^L$  as it columns, and  $\bar{\mathbf{A}} \in \mathbb{R}^{d \times L} = [\bar{\mathbf{x}}_{i_1}, \dots, \bar{\mathbf{x}}_{i_L}]$  be the matrix with  $\{\tilde{\mathbf{x}}_{i_j}\}_{j=1}^L$  as it columns. Then  $\bar{\mathbf{x}} \in \mathbf{H}_{\bar{\mathbf{A}}}$ .

Since  $\mathbf{x} \in \mathbf{X}^{(k)}$  is  $\gamma_k$ -away from the an external subspaces of dimension no greater than  $\tilde{d}_k$ ,  $\lambda_j \mathbf{x}_{i_j} \in \mathbf{H}_{\mathbf{A}}$ , we have  $d(\mathbf{x}, \mathbf{H}_{\mathbf{A}}) \geq \gamma_k$ .

According to Lemma 4, with probability at least  $1 - 4de^{-\frac{p\varepsilon^2}{c}}$ ,  $\|\tilde{\mathbf{x}}_{i_j} - \mathbf{x}_{i_j}\|_2 \leq \sqrt{d}\|\mathbf{x}_{i_j}\|_2\varepsilon = \sqrt{d}\varepsilon$ . By union bound, with probability at least  $1 - 4Lde^{-\frac{p\varepsilon^2}{c}}$ ,

$$\|\mathbf{A} - \bar{\mathbf{A}}\|_2 \leq \|\mathbf{A} - \bar{\mathbf{A}}\|_F = \sqrt{dL}\varepsilon \quad (19)$$

By similar argument in the proof of Theorem 3,  $|\sigma_i(\mathbf{A}) - \sigma_i(\bar{\mathbf{A}})| \leq \|\mathbf{A} - \bar{\mathbf{A}}\|_2$ . Then we have  $\sigma_L(\bar{\mathbf{A}}) \geq \sigma_{\tilde{d}_k} - \sqrt{dL}\varepsilon > 0$ . It follows that  $\text{rank}(\bar{\mathbf{A}}) = L$ . Also,  $\sigma_L(\mathbf{A}) \geq \sigma_{\tilde{d}_k}$ . Based on Lemma 2 and (12), we have

$$\begin{aligned} |d(\mathbf{x}, \mathbf{H}_{\mathbf{A}}) - d(\mathbf{x}, \mathbf{H}_{\bar{\mathbf{A}}})| &\leq \frac{\sqrt{dL}\varepsilon\|\mathbf{x}\|_2}{\min\{\sigma_L(\mathbf{A}), \sigma_L(\bar{\mathbf{A}})\}} \\ &\leq \frac{\sqrt{dL}\varepsilon}{\sigma_{\tilde{d}_k} - \sqrt{dL}\varepsilon} \end{aligned} \quad (20)$$

In addition,

$$|d(\bar{\mathbf{x}}, \mathbf{H}_{\bar{\mathbf{A}}}) - d(\mathbf{x}, \mathbf{H}_{\bar{\mathbf{A}}})| \leq \|\bar{\mathbf{x}} - \mathbf{x}\|_2 \leq \sqrt{d}\varepsilon \quad (21)$$

Combining (12) and (13), we have

$$|d(\bar{\mathbf{x}}, \mathbf{H}_{\bar{\mathbf{A}}}) - d(\mathbf{x}, \mathbf{H}_{\bar{\mathbf{A}}})| \leq \sqrt{d}\varepsilon(1 + \frac{\sqrt{L}}{\sigma_{\tilde{d}_k} - \sqrt{dL}\varepsilon}) \quad (22)$$

Since  $\mathbf{x} \in \mathbf{X}^{(k)}$  is  $\gamma_k$ -away from the an external subspaces of dimension no greater than  $\tilde{d}_k$ , we have  $d(\mathbf{x}, \mathbf{H}_{\bar{\mathbf{A}}}) \geq \gamma_k$ . Therefore,  $d(\bar{\mathbf{x}}, \mathbf{H}_{\bar{\mathbf{A}}}) \geq \gamma_k - \sqrt{d}\varepsilon(1 + \frac{\sqrt{L}}{\sigma_{\tilde{d}_k} - \sqrt{dL}\varepsilon}) > 0$ . It follows that  $\bar{\mathbf{x}} \notin \mathbf{H}_{\bar{\mathbf{A}}}$ , and  $\tilde{\mathbf{x}} \notin \mathbf{H}_{\{\tilde{\mathbf{x}}_{i_j}\}_{j=1}^L}$ . This contradiction shows that all the data points in  $\mathbf{X}^{(k)}$  are away from the external subspaces under the linear transformation  $\mathbf{P}$  for any  $1 \leq k \leq K$ . It can also be verified that data  $\tilde{\mathbf{X}}^{(k)}$  are in generation position by similar argument and the definition of general position with margin. Therefore, the conclusion of this theorem follows by applying Theorem 2.  $\square$

## References

- [1] N. Halko, P. G. Martinsson, and J. A. Tropp. Finding structure with randomness: Probabilistic algorithms for constructing approximate matrix decompositions. *SIAM Rev.*, 53(2):217–288, May 2011.
- [2] Yan Mei Chen, Xiao Shan Chen, and Wen Li. On perturbation bounds for orthogonal projections. *Numerical Algorithms*, 73(2):433–444, Oct 2016.
- [3] G. W. Stewart. On the perturbation of pseudo-inverses, projections and linear least squares problems. *SIAM Review*, 19(4):634–662, 1977.
- [4] H. Weyl. Das asymptotische verteilungsgesetz der eigenwerte linearer partieller differentialgleichungen (mit einer anwendung auf die theorie der hohlraumstrahlung). *Mathematische Annalen*, 71:441–479, 1912.
- [5] Lijun Zhang, Tianbao Yang, Rong Jin, and Zhi-Hua Zhou. Sparse learning for large-scale and high-dimensional data: A randomized convex-concave optimization approach. In *Algorithmic Learning Theory - 27th International Conference, ALT 2016, Bari, Italy, October 19-21, 2016, Proceedings*, pages 83–97, 2016.
